# ERRATUM

## Carbon biomass, elemental ratios (C:N) and stable isotopic composition (d13C, d15N) of dominant calanoid copepods during the winter-to-summer transition in the Amundsen Gulf (Arctic Ocean)

ALEXANDRE FOREST, VIRGINIE GALINDO, GÉRALD DARNIS, SIMON PINEAULT, CATHERINE LALANDE, JEAN-ÉRIC TREMBLAY AND LOUIS FORTIER

*Journal of Plankton Research*, **33**, 161–178.  
doi: 10.1093/plankt/fbq103

An error appears in the y-axis of Fig. 9. The figure is corrected below and in the online version. The publisher apologizes for this error.

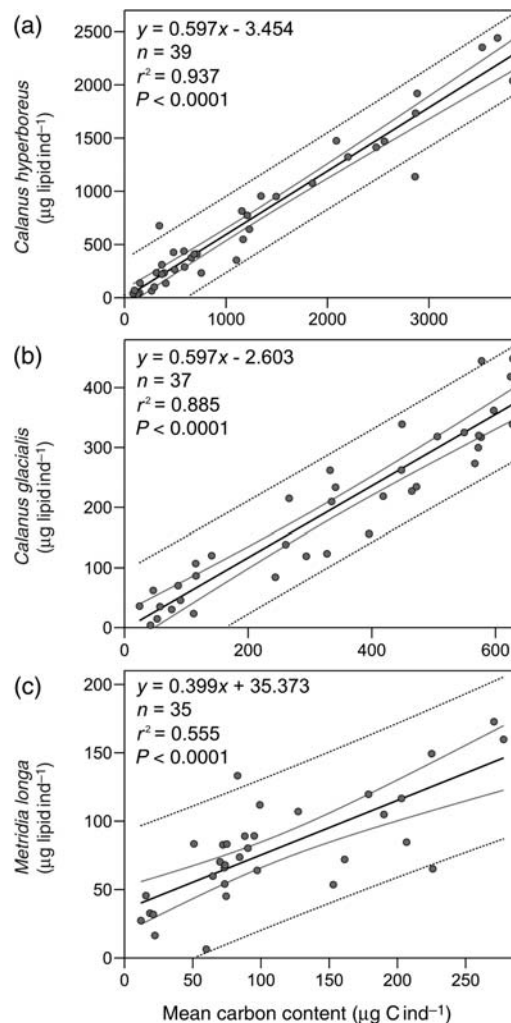

Source: http://academic.oup.com/plankt/article-pdf/33/3/547/4203852/fbr003.pdf
